# Supplementary figures and images for: Comparative genomic analysis identifies an evolutionary shift of vomeronasal receptor gene repertoires in the vertebrate transition from water to land
Source: HighWire-hosted journal article supplement (doi:10.1101/gr.6040007), 2007-01-08

Supplementary fig.1

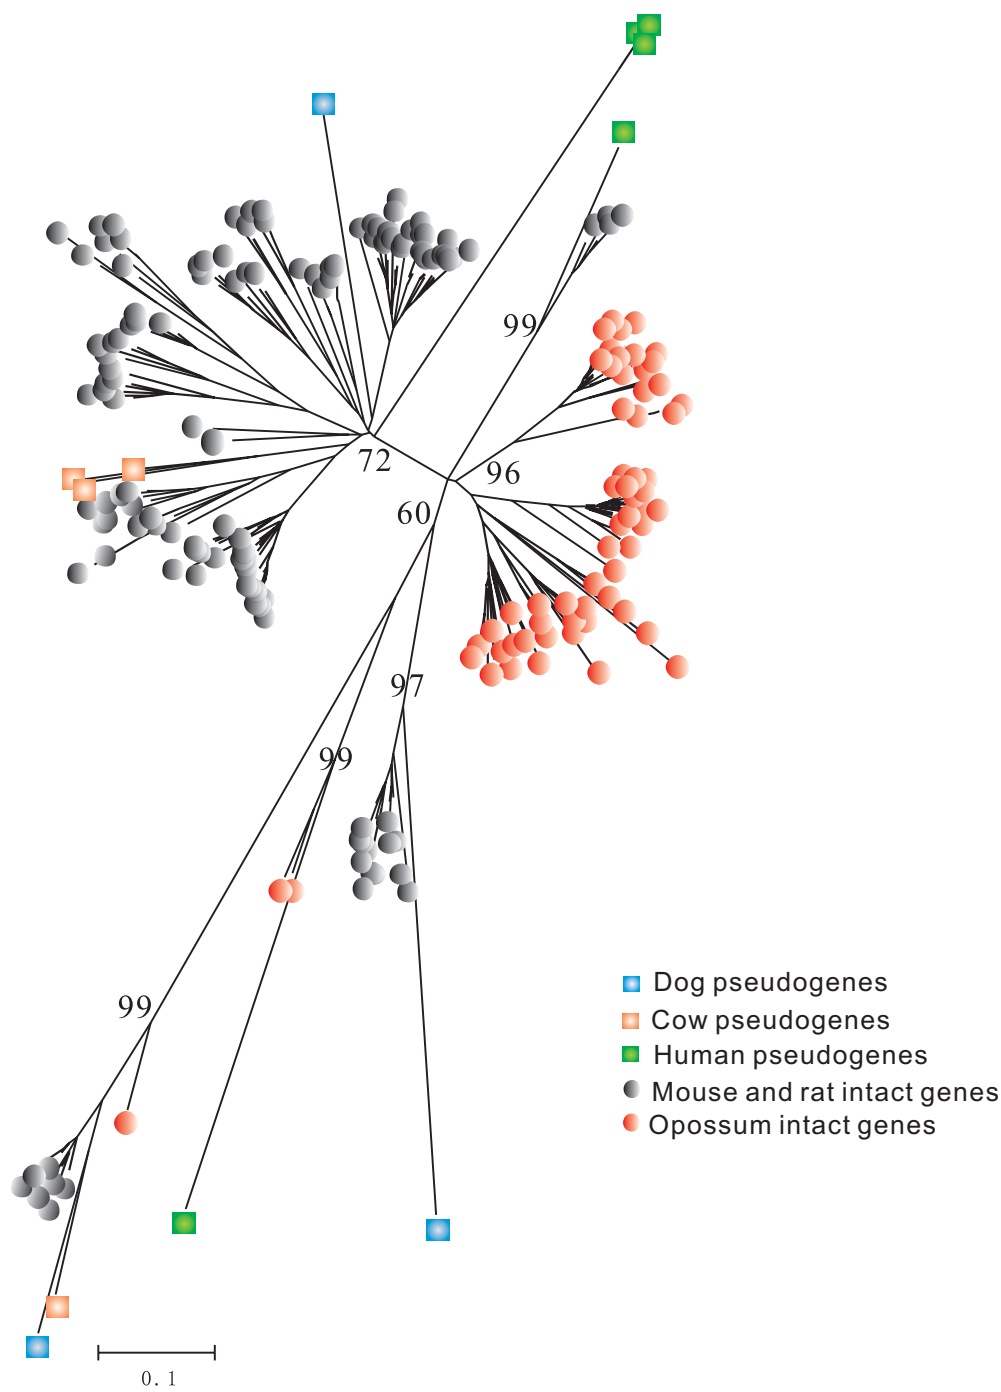

Supplement: supplementary_fig1.pdf [file supplementary_fig1.pdf]
